# Supplementary material for: Heterologous Prime-Boost Vaccination with Commercial FMD Vaccines Elicits a Broader Immune Response than Homologous Prime-Boost Vaccination in Pigs
Source: MDPI journal article supplement (doi:10.3390/vaccines11030551), 2023-02-25
Supplement: s1 [file s1]

Table S1. The ELISA results of individual pigs assayed by VDPPro FMDV type O Ab b-ELISA kit before FMDV vaccination (7 weeks of age).

| A-A                     | A-B        | A-C        | B-B        | B-A        | B-C        | C-C        | C-A        | C-B        |
|-------------------------|------------|------------|------------|------------|------------|------------|------------|------------|
| No. PI (%) <sup>1</sup> | No. PI (%) |
| 501 94.6                | 101 94.8   | 112 94.8   | 801 92.9   | 201 97.5   | 212 72.0   | 901 77.9   | 301 32.3   | 401 27.5   |
| 502 96.8                | 102 96.7   | 113 91.8   | 802 82.6   | 202 96.9   | 213 60.7   | 902 92.9   | 302 97.5   | 402 96.2   |
| 503 77.4                | 103 95.2   | 114 89.6   | 803 78.4   | 203 99.6   | 214 89.9   | 903 79.2   | 303 35.2   | 403 86.1   |
| 504 88.8                | 104 76.5   | 115 94.5   | 804 91.8   | 204 71.7   | 215 96.2   | 904 70.7   | 304 88.7   | 404 91.3   |
| 505 80.8                | 105 94.3   | 116 95.5   | 805 46.9   | 205 84.8   | 216 93.1   | 905 90.6   | 305 58.8   | 405 49.0   |
| 506 77.5                | 106 95.4   | 117 95.1   | 806 90.3   | 206 93.4   | 217 85.1   | 906 80.8   | 306 99.2   | 406 83.0   |
| 507 72.6                | 107 95.1   | 118 90.7   | 807 11.6   | 207 95.6   | 218 78.0   | 907 85.0   | 307 34.4   | 407 93.8   |
| 508 80.8                | 108 93.6   | 119 96.5   | 808 92.1   | 208 88.7   | 219 87.3   | 908 90.4   | 308 77.5   | 408 89.9   |
| 509 70.6                | 109 92.4   | 120 96.5   | 809 82.5   | 209 96.1   | 220 72.4   | 909 88.9   | 309 84.9   | 409 53.0   |
| 510 12.8                | 110 94.0   | 121 96.2   | 810 89.6   | 210 77.3   | 221 96.2   | 910 87.5   | 310 77.7   | 410 81.8   |
| 511 81.9                | 111 91.7   | 122 94.5   | 811 91.7   | 211 97.3   | 222 94.8   | 911 10.9   | 311 80.8   | 411 97.1   |
| 512 77.4                | 601 78.2   | 612 35.8   | 812 67.7   | 701 53.3   | 712 83.5   | 912 81.4   | 312 75.7   | 412 79.3   |
| 513 90.3                | 602 88.8   | 613 81.1   | 813 94.9   | 702 25.2   | 713 98.0   | 913 77.5   | 313 83.8   | 413 88.7   |
| 514 89.1                | 603 94.9   | 614 83.9   | 814 49.7   | 703 86.4   | 714 81.2   | 914 82.9   | 314 91.0   | 414 83.9   |
| 515 96.6                | 604 91.7   | 615 75.5   | 815 75.6   | 704 48.2   | 715 96.0   | 915 65.2   | 315 75.1   | 415 32.8   |
| 516 84.3                | 605 2.1    | 616 82.3   | 816 91.1   | 705 86.9   | 716 52.1   | 916 82.7   | 316 97.8   | 416 84.0   |
| 517 20.2                | 606 90.5   | 617 17.4   | 817 86.1   | 706 84.4   | 717 35.8   | 917 86.0   | 317 33.1   | 417 75.9   |
| 518 71.3                | 607 17.8   | 618 92.9   | 818 85.3   | 707 86.0   | 718 84.4   | 918 91.3   | 318 76.5   | 418 33.8   |
| 519 76.8                | 608 76.2   | 619 85.5   | 819 87.2   | 708 80.2   | 719 46.9   | 919 1.6    | 319 78.6   | 419 91.2   |
| 520 92.9                | 609 86.8   | 620 87.8   | 820 91.1   | 709 78.6   | 720 77.3   | 920 83.5   | 320 36.7   | 420 40.2   |
| 521 88.1                | 610 91.6   | 621 94.0   | 821 67.3   | 710 56.2   | 721 85.7   | 921 64.9   | 321 50.8   | 421 88.5   |
| 522 70.3                | 611 86.6   | 622 47.2   | 822 13.4   | 711 83.3   | 722 43.2   | 922 81.1   | 322 76.0   | 422 84.4   |
| Me an                   | Me an      | Me an      | Me an      | Me an      | Me an      | Me an      | Me an      | Me an      |
| SD <sup>2</sup> 21.3    | SD 24.5    | SD 21.3    | SD 24.3    | SD 19.0    | SD 18.7    | SD 23.6    | SD 22.8    | SD 22.9    |

<sup>1</sup> Percent inhibition (%)

<sup>2</sup> Standard deviation
